# Supplementary material for: Evaluation of the Impact of the PABBS Suicide Bereavement Training on Clinicians' Knowledge and Skills
Source: Atypon-hosted journal article supplement (doi:10.1027/0227-5910/a000646), 2020-01-10
Supplement: 0227-5910_a000646_esm5.pdf [file 0227-5910_a000646_esm5.pdf]

# Electronic Supplementary Material 5. Perceptions of materials, training day and facilitators

| Training elements                                           | Disagree<br>/Strongly<br>disagree |    | Neither<br>agree or<br>disagree |    | Agree/<br>strongly<br>agree |    | Number of<br>Responses<br>(max<br>n=62) |
|-------------------------------------------------------------|-----------------------------------|----|---------------------------------|----|-----------------------------|----|-----------------------------------------|
|                                                             | %                                 | n  | %                               | n  | %                           | n  |                                         |
| Materials                                                   |                                   |    |                                 |    |                             |    |                                         |
| Were informative                                            | 0                                 | 0  | 0                               | 0  | 100                         | 61 | 61                                      |
| Presentation was of high quality                            | 0                                 | 0  | 0                               | 0  | 100                         | 61 | 61                                      |
| I am likely to use the practitioner manual in my work place | 0                                 | 0  | 3.3                             | 2  | 96.7                        | 48 | 60                                      |
| I found it helpful to have a separate manual and work book  | 3.4                               | 2  | 16.9                            | 10 | 79.7                        | 47 | 61                                      |
| The video clips enhanced my learning                        | 0                                 | 0  | 1.6                             | 1  | 98.4                        | 60 | 61                                      |
| Training day                                                |                                   |    |                                 |    |                             |    |                                         |
| Met my expectations                                         | 0                                 | 0  | 6.5                             | 4  | 93.5                        | 54 | 62                                      |
| Was effectively designed                                    | 0                                 | 0  | 3.2                             | 2  | 95.2                        | 59 | 62                                      |
| Contained the right amount of material for the time         | 20.0                              | 12 | 13.3                            | 8  | 66.7                        | 40 | 60                                      |
| Was well facilitated                                        | 0                                 | 0  | 1.6                             | 1  | 98.4                        | 60 | 61                                      |
| Met the stated objectives                                   | 0                                 | 0  | 4.9                             | 3  | 95.1                        | 58 | 61                                      |
| Facilitators                                                |                                   |    |                                 |    |                             |    |                                         |
| Were well prepared                                          | 0                                 | 0  | 0                               | 0  | 100                         | 62 | 62                                      |
| Were receptive to questions                                 | 1.6                               | 1  | 0                               | 0  | 98.4                        | 61 | 62                                      |
| Used audio/visual aids effectively                          | 0                                 | 0  | 0                               | 0  | 100                         | 62 | 62                                      |
| Stimulated my interest in the subject                       | 0                                 | 0  | 0                               | 0  | 100                         | 62 | 62                                      |
| Gave delegates individual attention                         | 0                                 | 0  | 1.6                             | 1  | 98.4                        | 61 | 62                                      |
| Created a supportive learning environment                   | 0                                 | 0  | 1.6                             | 1  | 98.4                        | 61 | 62                                      |
| Encouraged participation                                    | 1.6                               | 1  | 0                               | 0  | 98.4                        | 61 | 62                                      |
